# Supplementary material for: Suppression of Bcl3 Disrupts Viability of Breast Cancer Cells through Both p53-Dependent and p53-Independent Mechanisms via Loss of NF-κB Signalling
Source: MDPI journal article supplement (doi:10.3390/biomedicines12010143), 2024-01-10
Supplement: s1 [file s1]

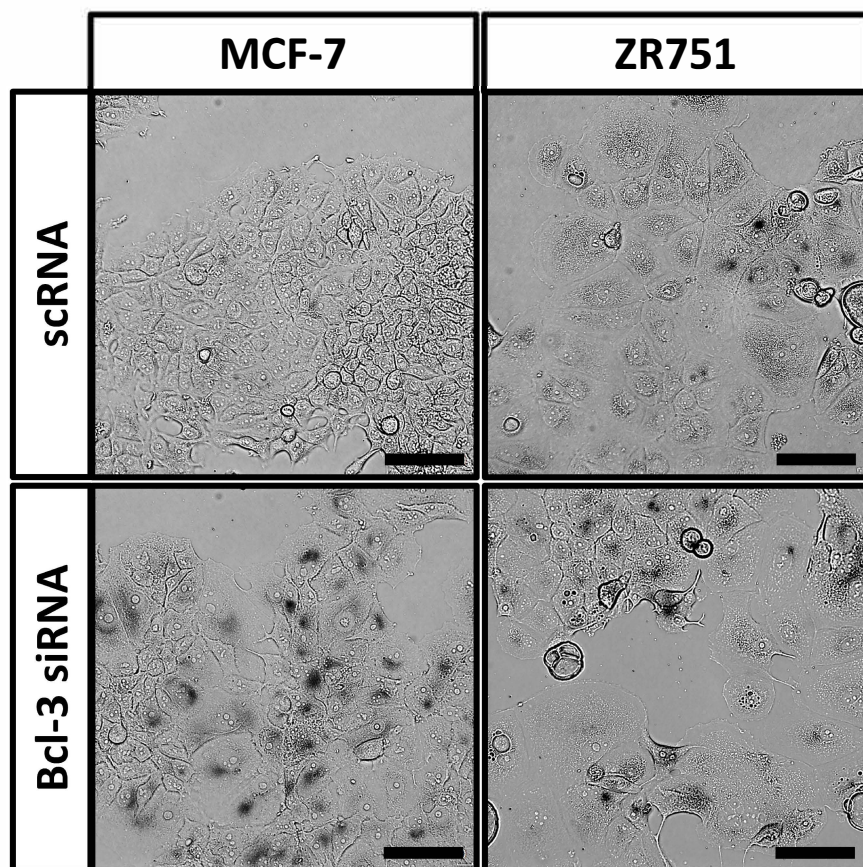

**Supplementary Figure S3- Bcl-3 suppression increases SA- $\beta$ -gal staining in p53 wildtype breast cancer cell lines.** Representative images of MCF-7 and ZR751 cells stained with  $\beta$ -galactosidase following 6 days of Bcl-3 siRNA treatment. Scale bar = 100 $\mu$ m.
