# Supplementary material for: Suppression of Bcl3 Disrupts Viability of Breast Cancer Cells through Both p53-Dependent and p53-Independent Mechanisms via Loss of NF-κB Signalling
Source: MDPI journal article supplement (doi:10.3390/biomedicines12010143), 2024-01-10
Supplement: s1 [file s1]

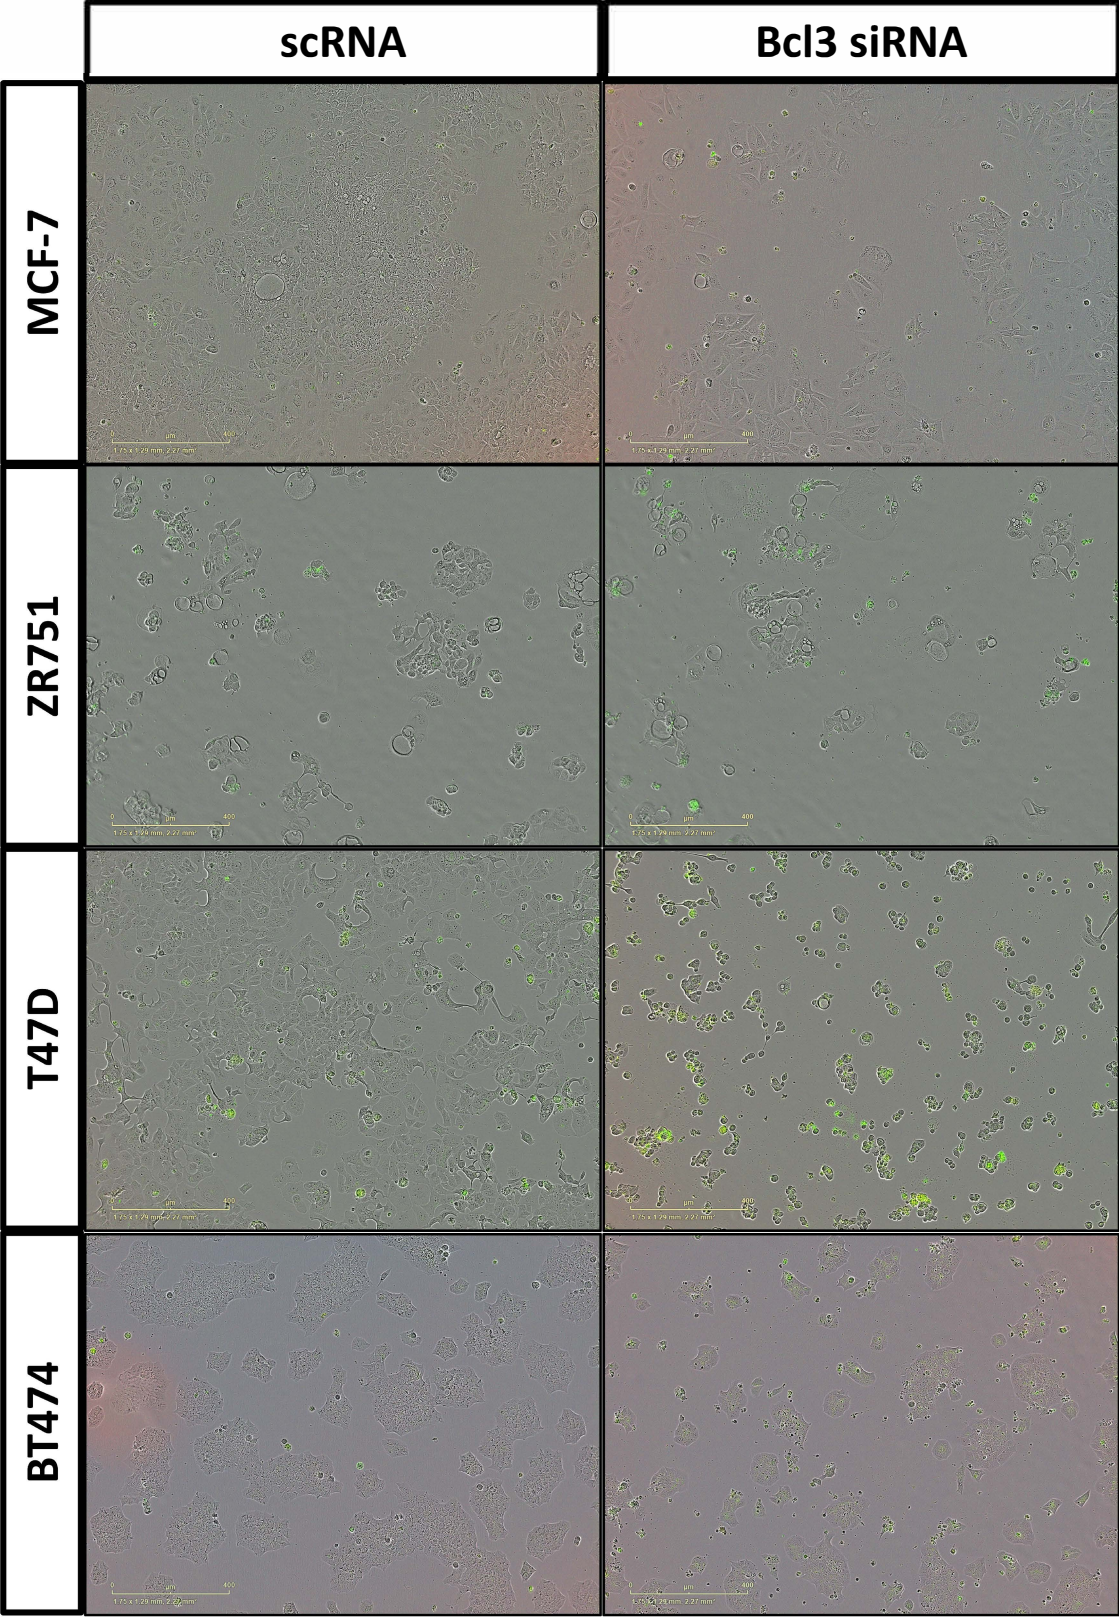

**Supplementary Figure S1- Bcl-3 suppression increases apoptosis in breast cancer cell lines.** Representative images of IncuCyte annexin V staining in MCF-7, ZR751, T47D and BT474 cells following 6 days of Bcl-3 siRNA treatment.
