# Supplementary material for: Suppression of Bcl3 Disrupts Viability of Breast Cancer Cells through Both p53-Dependent and p53-Independent Mechanisms via Loss of NF-κB Signalling
Source: MDPI journal article supplement (doi:10.3390/biomedicines12010143), 2024-01-10
Supplement: s1 [file s1]

**A**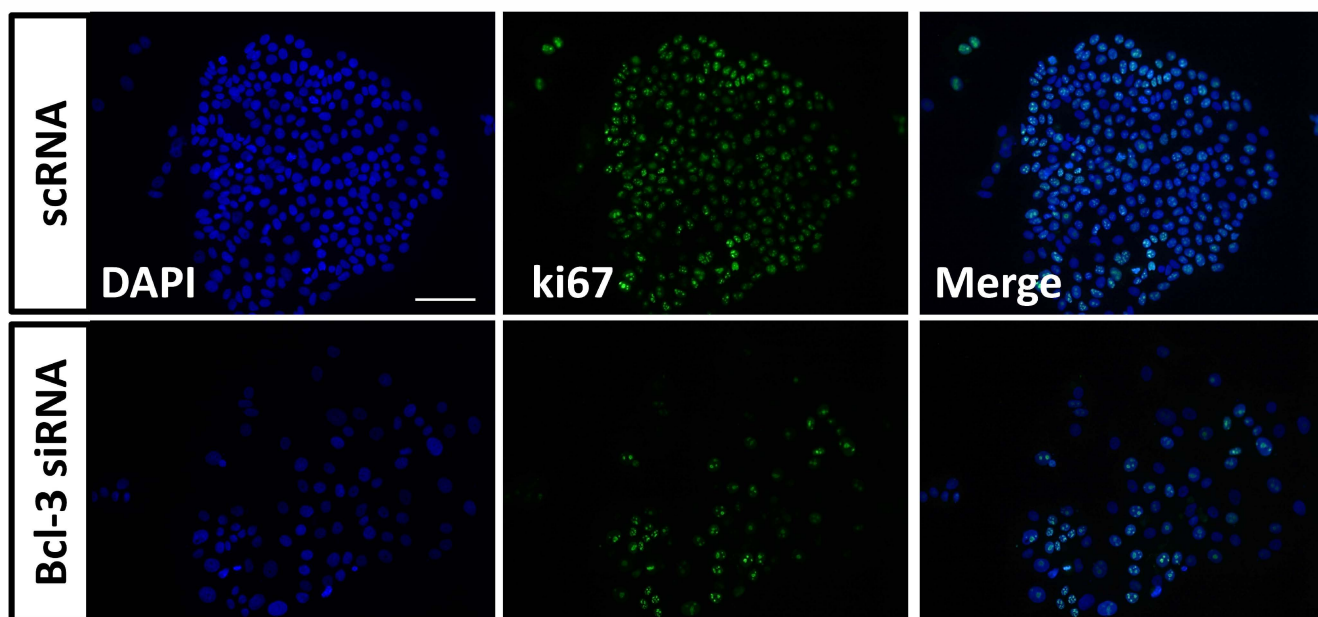**B**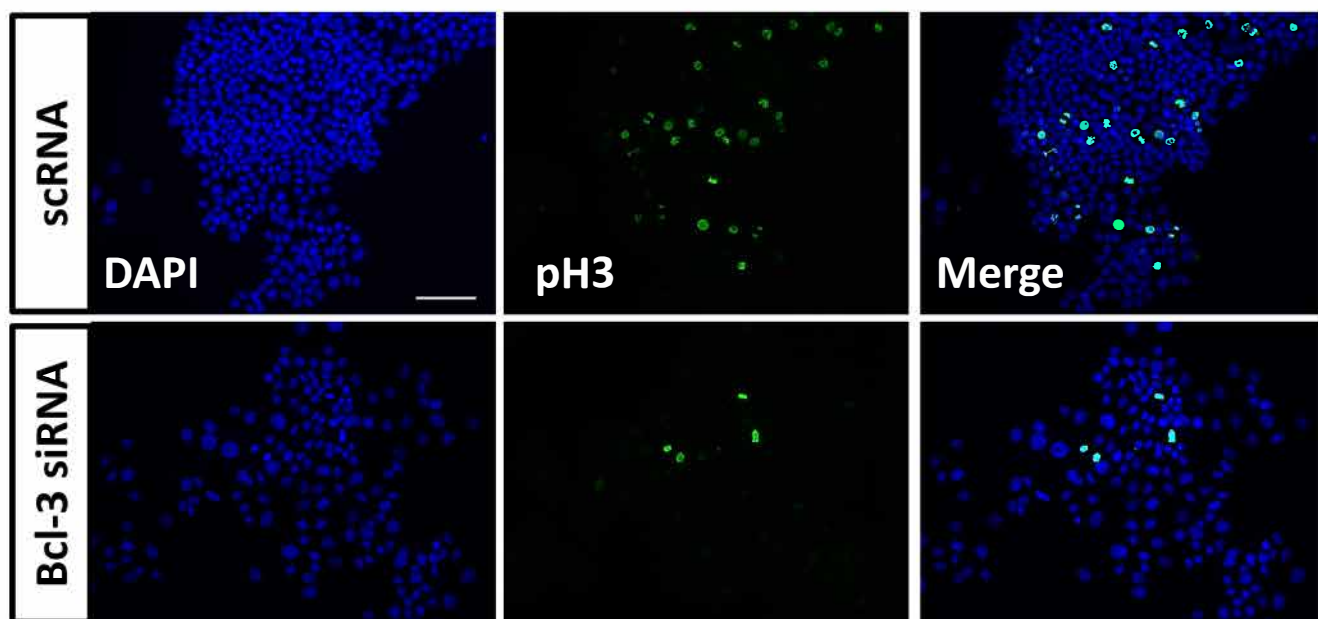

**Supplementary Figure S2- Bcl-3 suppression reduces the percentage of ki67 and pH3 positive MCF-7 cells.** Representative images of MCF-7 cells stained for either (A) ki67 or (B) pH3 following 6 days of Bcl-3 siRNA treatment. Scale bar = 75  $\mu$ m.
