# Supplementary material for: Suppression of Bcl3 Disrupts Viability of Breast Cancer Cells through Both p53-Dependent and p53-Independent Mechanisms via Loss of NF-κB Signalling
Source: MDPI journal article supplement (doi:10.3390/biomedicines12010143), 2024-01-10
Supplement: s1 [file s1]

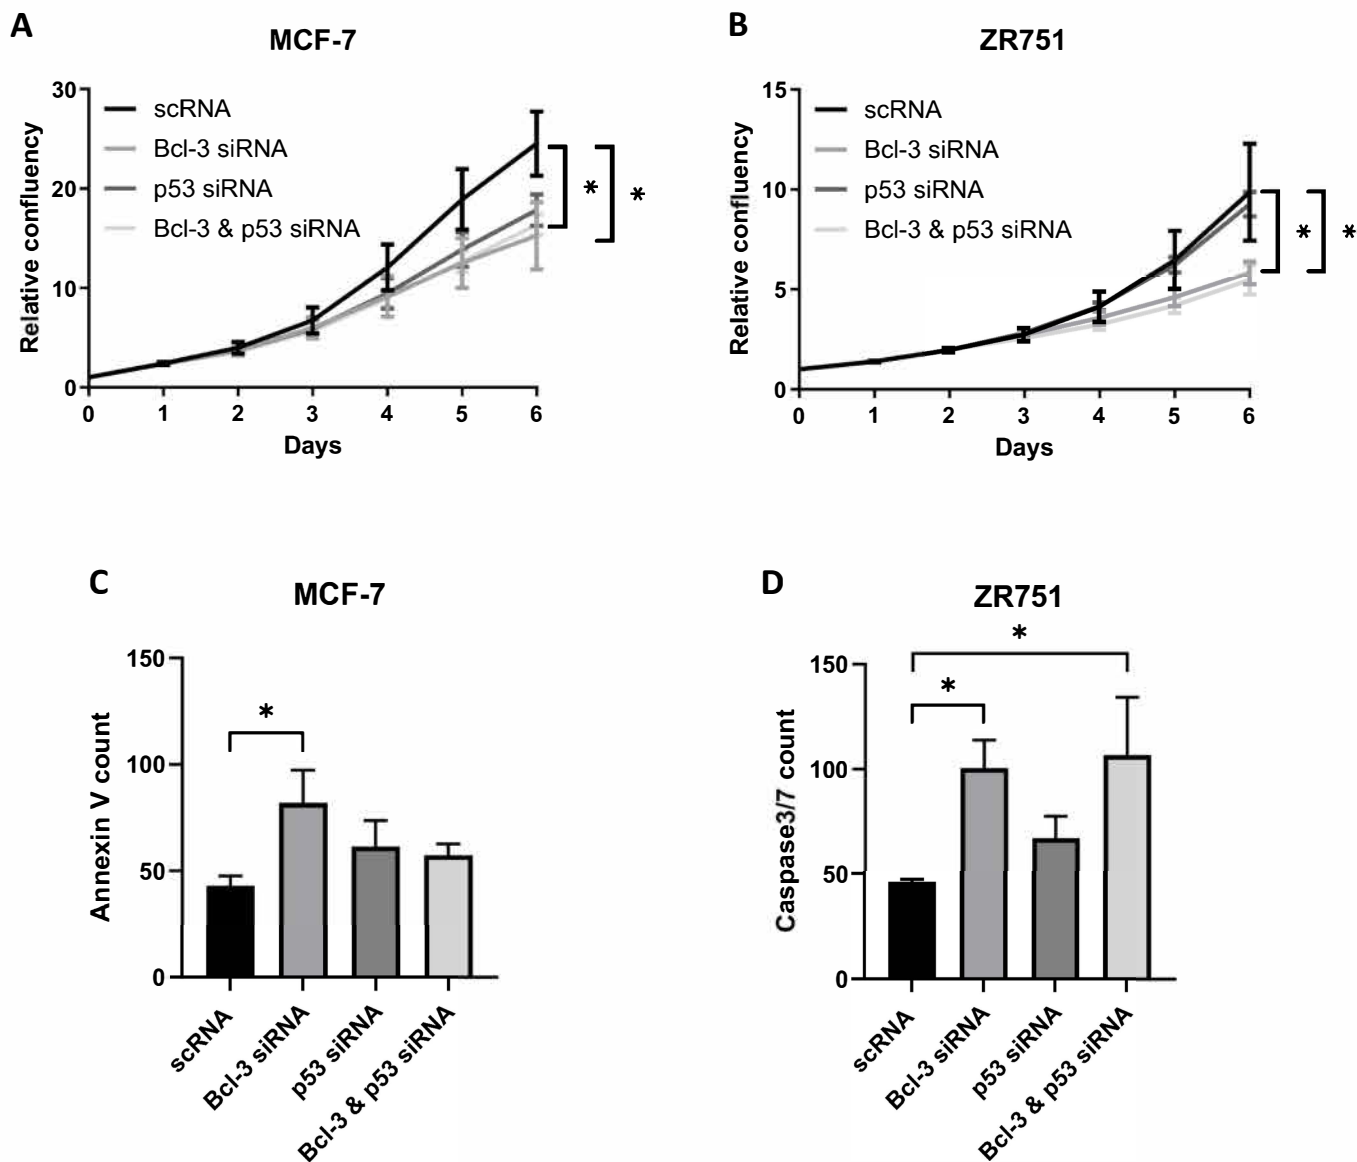

**Supplementary Figure S4- Additional loss of p53 following Bcl-3 suppression does not increase apoptosis.** IncuCyte analysis of (A) MCF-7 and (B) ZR751 cells following siRNA suppression of Bcl-3 and/or p53 showed no additional loss in confluency when Bcl-3 and p53 were simultaneously suppressed compared to Bcl-3 alone. (C) Annexin V counts in MCF-7 cells and (D) caspase 3/7 counts in ZR751 cells 6 days post siRNA transfection were not increased with additional p53 suppression.
